# Supplementary material for: Genome-wide analysis of maize OSCA family members and their involvement in drought stress
Source: PeerJ. 2019 Apr 11;7:e6765. doi: 10.7717/peerj.6765 (PMC6462396; doi:10.7717/peerj.6765)
Supplement: Supplemental Information 2 — Raw data for collinear segments between maize, rice, and sorghum genomes in Fig. 3. [file peerj-07-6765-s002.xlsx]

## Sheet: Sheet1
Table S2. Genomic syntenic blocks among maize, rice and sorghum genomes.
The gene colinearity data were collected from the Plant Genome Duplication Database (PGDD, http://chibba.agtec.uga.edu/duplication). The maize, sorghum, and rice genome was abbreviated as Zm, Sb, and Os, respectively. The chromosomes of different species were abbreviated as “chr” plus Arabic numbers. The physical initiation position of each homozygous TCP gene and the resident genomic block in di…
block_no	chrom_zm	chrom_os	zm	zm_start	os	os_start	Os_block_start	Os_block_end	Zm_block_start	Zm_block_end
1	1	Chr10	GRMZM2G128641	105768302	LOC_Os10g42820	23088097	93276603	107319928	22166887	23206044
block_no	chrom_zm	chrom_sb	zm	zm_start	sb	sb_start	Sb_block_start	Sb_block_end	Zm_block_start	Zm_block_end
4	1	Chr01	GRMZM2G409093	257374446	Sobic.001G140000	11121192	255299808	260580602	10769954	12297042
block_no	chrom_zm	chrom_os	zm	zm_start	os	os_start	Os_block_start	Os_block_end	Zm_block_start	Zm_block_end
11	1	Chr12	GRMZM2G039186	162423806	LOC_Os12g39320	24191441	146791261	180980529	22710810	27508851
block_no	chrom_zm	chrom_sb	zm	zm_start	sb	sb_start	Sb_block_start	Sb_block_end	Zm_block_start	Zm_block_end
21	1	Chr01	GRMZM2G128641	105768302	Sobic.001G282700	48312149	100832229	121407836	42564137	49069126
block_no	chrom_zm	chrom_os	zm	zm_start	os	os_start	Os_block_start	Os_block_end	Zm_block_start	Zm_block_end
42	1	Chr3	GRMZM2G409093	257374446	LOC_Os03g47070	26623597	256427015	260580602	25147429	27116532
block_no	chrom_zm	chrom_sb	zm	zm_start	sb	sb_start	Sb_block_start	Sb_block_end	Zm_block_start	Zm_block_end
49	1	Chr08	GRMZM2G039186	162423806	Sobic.008G144900	50201335	146169831	180980529	47762638	55300817
block_no	chrom_zm	chrom_sb	zm	zm_start	sb	sb_start	Sb_block_start	Sb_block_end	Zm_block_start	Zm_block_end
162	3	Chr03	GRMZM2G021194	227851107	Sobic.003G181600	47886152	225910755	228923080	45520670	51097607
block_no	chrom_zm	chrom_sb	zm	zm_start	sb	sb_start	Sb_block_start	Sb_block_end	Zm_block_start	Zm_block_end
175	3	Chr08	GRMZM2G163059	92553058	Sobic.008G187100	54834255	90422238	94815743	54668924	55333774
block_no	chrom_zm	chrom_sb	zm	zm_start	sb	sb_start	Sb_block_start	Sb_block_end	Zm_block_start	Zm_block_end
259	5	Chr01	GRMZM2G164470	9382504	Sobic.001G106800	8238429	81133	17884825	154570	12811225
block_no	chrom_zm	chrom_sb	zm	zm_start	sb	sb_start	Sb_block_start	Sb_block_end	Zm_block_start	Zm_block_end
317	6	Chr09	GRMZM2G181206	148321071	Sobic.009G145000	50248353	142535120	148787678	46884719	50512641
block_no	chrom_zm	chrom_os	zm	zm_start	os	os_start	Os_block_start	Os_block_end	Zm_block_start	Zm_block_end
335	5	Chr3	GRMZM2G164470	9382504	LOC_Os03g51620	29543829	9194759	17083849	24905585	29747861
block_no	chrom_zm	chrom_sb	zm	zm_start	sb	sb_start	Sb_block_start	Sb_block_end	Zm_block_start	Zm_block_end
378	8	Chr03	GRMZM2G402708	158106071	Sobic.003G427000	73071109	155978930	175288181	62033089	74406451
383	6	Chr5	GRMZM2G181206	148321071	LOC_Os05g32720	19160140	142535120	148787678	18126333	21068427
block_no	chrom_zm	chrom_sb	zm	zm_start	sb	sb_start	Sb_block_start	Sb_block_end	Zm_block_start	Zm_block_end
389	8	Chr09	GRMZM2G456000	78524061	Sobic.009G258100	59203680	61990787	78707467	55920160	59307598
416	9	Chr01	GRMZM2G059891	152235892	Sobic.001G512400	70820048	151754417	152582329	70185498	71280610
block_no	chrom_zm	chrom_os	zm	zm_start	os	os_start	Os_block_start	Os_block_end	Zm_block_start	Zm_block_end
467	8	Chr1	GRMZM2G402708	158106071	LOC_Os01g72210	41869930	155999788	158929580	41573907	43173178
block_no	chrom_zm	chrom_os	zm	zm_start	os	os_start	Os_block_start	Os_block_end	Zm_block_start	Zm_block_end
481	8	Chr5	GRMZM2G456000	78524061	LOC_Os05g51630	29608182	61990787	78707467	26820731	29694648
block_no	chrom_zm	chrom_os	zm	zm_start	os	os_start	Os_block_start	Os_block_end	Zm_block_start	Zm_block_end
514	9	Chr3	GRMZM2G059891	152235892	LOC_Os03g04450	2065043	151754417	152582329	1720034	2525960

## Sheet: Sheet2
block_no	chrom_zm	chrom_os	zm	zm_start	os	os_start	Os_block_start	Os_block_end	Zm_block_start	Zm_block_end
1	1	Chr10	GRMZM2G128641	105768302	LOC_Os10g42820	23088097	93276603	107319928	22166887	23206044
block_no	chrom_zm	chrom_sb	zm	zm_start	sb	sb_start	Sb_block_start	Sb_block_end	Zm_block_start	Zm_block_end
4	1	Chr01	GRMZM2G409093	257374446	Sobic.001G140000	11121192	255299808	260580602	10769954	12297042
block_no	chrom_zm	chrom_os	zm	zm_start	os	os_start	Os_block_start	Os_block_end	Zm_block_start	Zm_block_end
11	1	Chr12	GRMZM2G039186	162423806	LOC_Os12g39320	24191441	146791261	180980529	22710810	27508851
11	1	Chr12	GRMZM2G039186	162423806	LOC_Os12g43720	27154449	146791261	180980529	22710810	27508851
block_no	chrom_zm	chrom_sb	zm	zm_start	sb	sb_start	Sb_block_start	Sb_block_end	Zm_block_start	Zm_block_end
21	1	Chr01	GRMZM2G128641	105768302	Sobic.001G282700	48312149	100832229	121407836	42564137	49069126
block_no	chrom_zm	chrom_os	zm	zm_start	os	os_start	Os_block_start	Os_block_end	Zm_block_start	Zm_block_end
42	1	Chr3	GRMZM2G409093	257374446	LOC_Os03g47070	26623597	256427015	260580602	25147429	27116532
block_no	chrom_zm	chrom_sb	zm	zm_start	sb	sb_start	Sb_block_start	Sb_block_end	Zm_block_start	Zm_block_end
49	1	Chr08	GRMZM2G039186	162423806	Sobic.008G144900	50201335	146169831	180980529	47762638	55300817
49	1	Chr08	GRMZM2G039186	162423806	Sobic.008G187100	54834255	146169831	180980529	47762638	55300817
block_no	chrom_zm	chrom_sb	zm	zm_start	sb	sb_start	Sb_block_start	Sb_block_end	Zm_block_start	Zm_block_end
162	3	Chr03	GRMZM2G021194	227851107	Sobic.003G181600	47886152	225910755	228923080	45520670	51097607
block_no	chrom_zm	chrom_sb	zm	zm_start	sb	sb_start	Sb_block_start	Sb_block_end	Zm_block_start	Zm_block_end
175	3	Chr08	GRMZM2G163059	92553058	Sobic.008G187100	54834255	90422238	94815743	54668924	55333774
block_no	chrom_zm	chrom_sb	zm	zm_start	sb	sb_start	Sb_block_start	Sb_block_end	Zm_block_start	Zm_block_end
259	5	Chr01	GRMZM2G164470	9382504	Sobic.001G106800	8238429	81133	17884825	154570	12811225
259	5	Chr01	GRMZM2G164470	9382504	Sobic.001G140000	11121192	81133	17884825	154570	12811225
block_no	chrom_zm	chrom_sb	zm	zm_start	sb	sb_start	Sb_block_start	Sb_block_end	Zm_block_start	Zm_block_end
317	6	Chr09	GRMZM2G181206	148321071	Sobic.009G145000	50248353	142535120	148787678	46884719	50512641
block_no	chrom_zm	chrom_os	zm	zm_start	os	os_start	Os_block_start	Os_block_end	Zm_block_start	Zm_block_end
335	5	Chr3	GRMZM2G164470	9382504	LOC_Os03g47070	26623597	9194759	17083849	24905585	29747861
335	5	Chr3	GRMZM2G164470	9382504	LOC_Os03g51620	29543829	9194759	17083849	24905585	29747861
block_no	chrom_zm	chrom_sb	zm	zm_start	sb	sb_start	Sb_block_start	Sb_block_end	Zm_block_start	Zm_block_end
378	8	Chr03	GRMZM2G402708	158106071	Sobic.003G427000	73071109	155978930	175288181	62033089	74406451
383	6	Chr5	GRMZM2G181206	148321071	LOC_Os05g32720	19160140	142535120	148787678	18126333	21068427
block_no	chrom_zm	chrom_sb	zm	zm_start	sb	sb_start	Sb_block_start	Sb_block_end	Zm_block_start	Zm_block_end
389	8	Chr09	GRMZM2G456000	78524061	Sobic.009G258100	59203680	61990787	78707467	55920160	59307598
416	9	Chr01	GRMZM2G059891	152235892	Sobic.001G512400	70820048	151754417	152582329	70185498	71280610
block_no	chrom_zm	chrom_os	zm	zm_start	os	os_start	Os_block_start	Os_block_end	Zm_block_start	Zm_block_end
467	8	Chr1	GRMZM2G402708	158106071	LOC_Os01g72210	41869930	155999788	158929580	41573907	43173178
block_no	chrom_zm	chrom_os	zm	zm_start	os	os_start	Os_block_start	Os_block_end	Zm_block_start	Zm_block_end
481	8	Chr5	GRMZM2G456000	78524061	LOC_Os05g51630	29608182	61990787	78707467	26820731	29694648
block_no	chrom_zm	chrom_os	zm	zm_start	os	os_start	Os_block_start	Os_block_end	Zm_block_start	Zm_block_end
514	9	Chr3	GRMZM2G059891	152235892	LOC_Os03g04450	2065043	151754417	152582329	1720034	2525960
